# Supplementary material for: A Portable Electrospinner for Nanofiber Synthesis and Its Application for Cosmetic Treatment of Alopecia
Source: MDPI journal article supplement (doi:10.3390/nano9091317), 2019-09-14
Supplement: s1 [file s1]

# Supporting Information

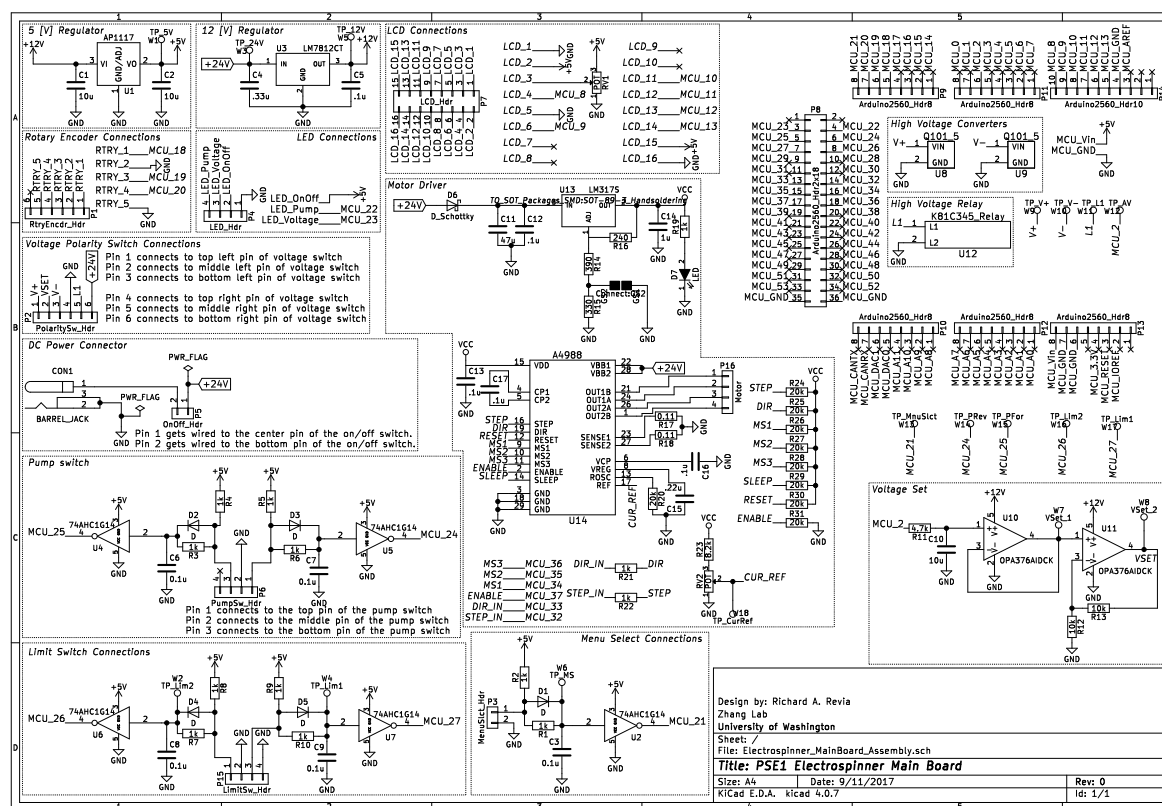

**Figure S1.** Circuit diagram of the main PCB.

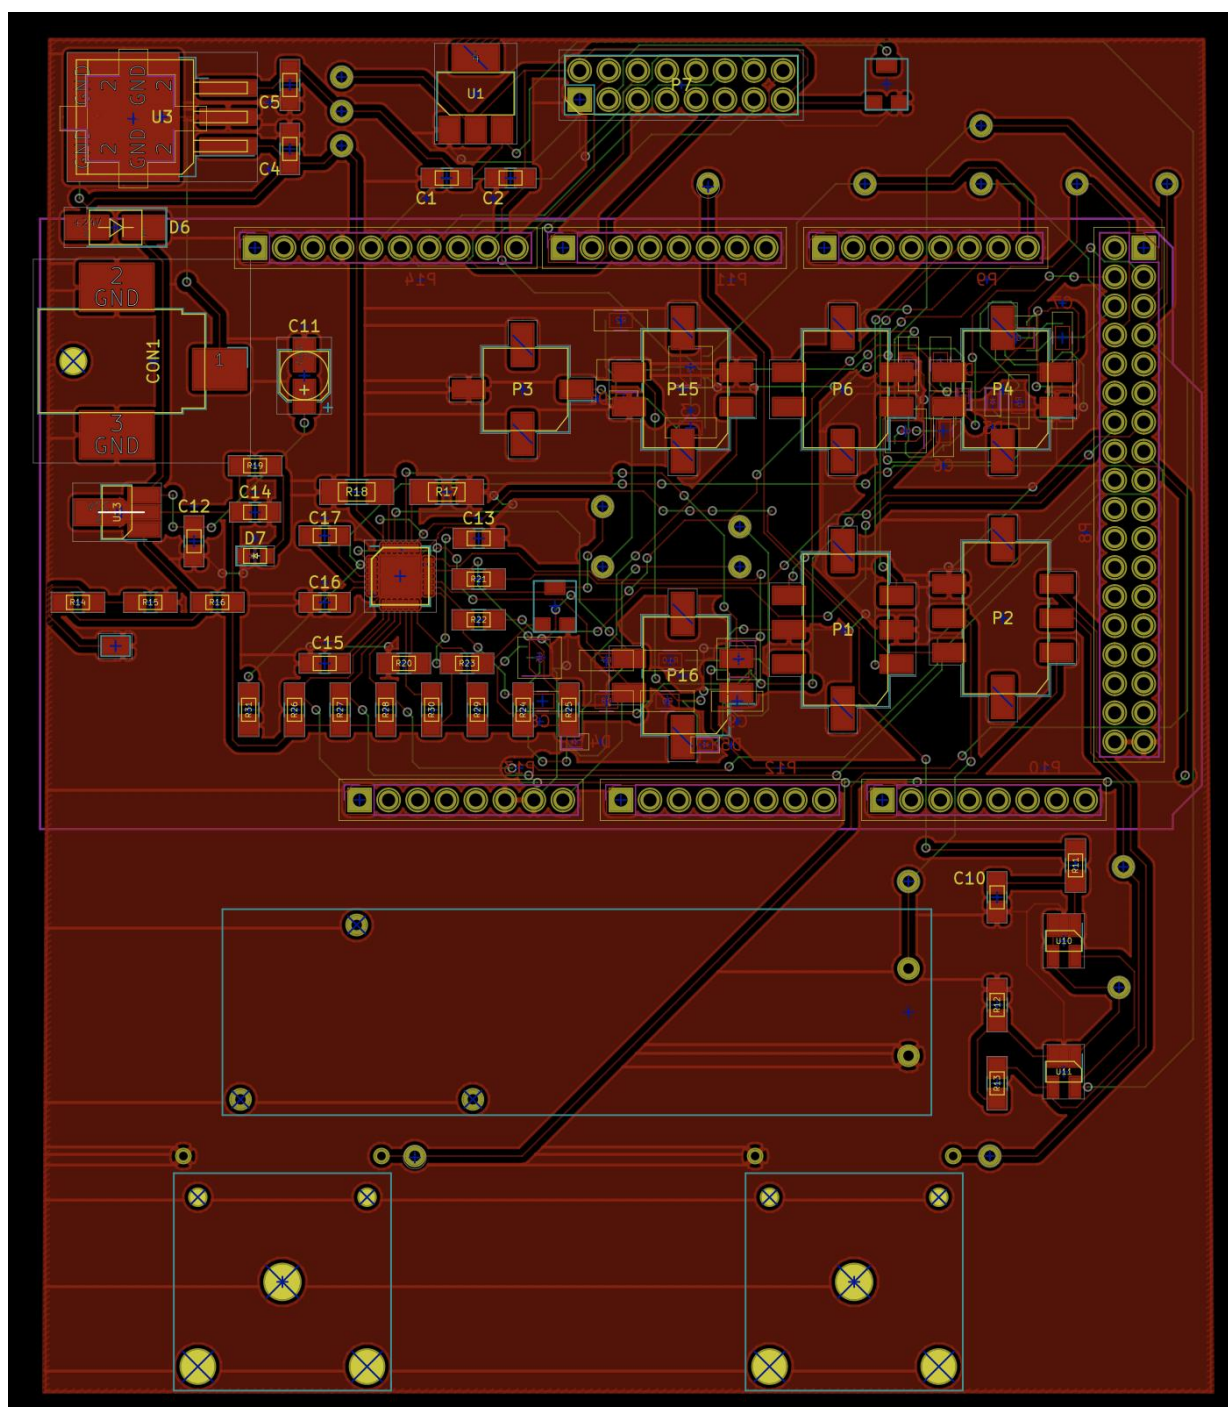

Figure S2. Main PCB layout.

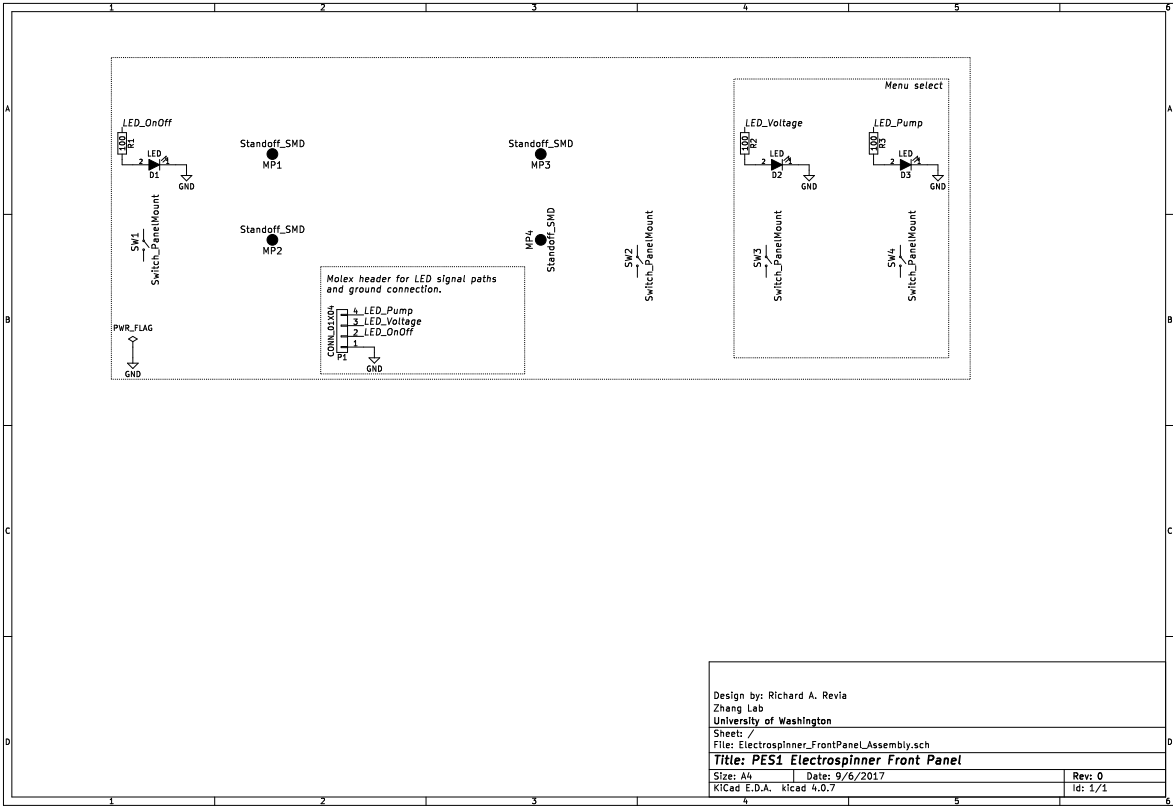

Figure S3. Front panel circuit schematic.

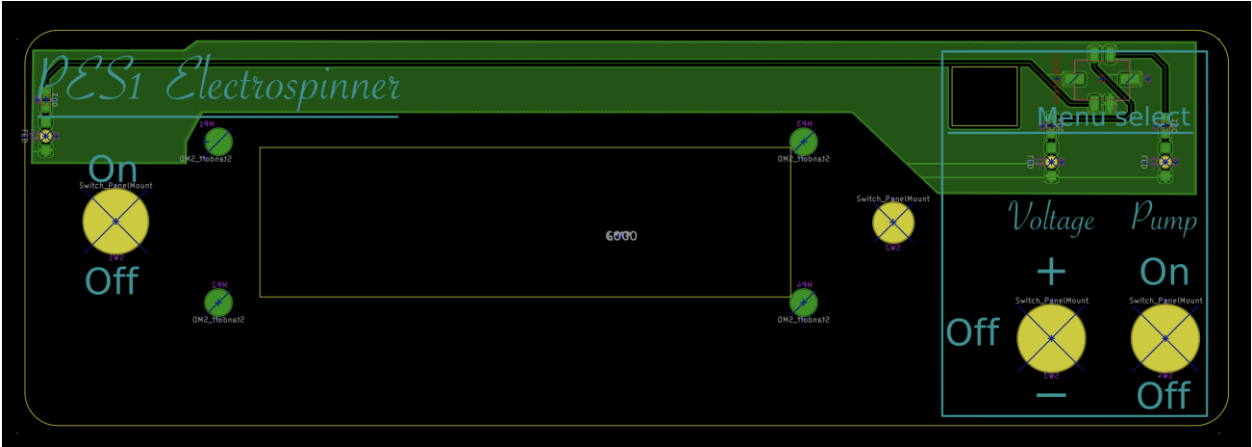

Figure S4. Front panel PCB design.
